# Supplementary material for: Al2O3-Supported W–V–O bronze catalysts for oxidative dehydrogenation of ethane
Source: Royal Society of Chemistry journal article supplement (doi:10.1039/d0cy01220c), 2020-01-01
Supplement: d0cy01220c1.pdf [file d0cy01220c1.pdf]

## SUPPORTING INFORMATION

### **Al<sub>2</sub>O<sub>3</sub>-Supported W-V-O bronzes catalysts for oxidative dehydrogenation of ethane**

S. Benomar<sup>a,b</sup>, A. Chierigato<sup>a,c</sup>, A. Masso<sup>a</sup>, M.D. Soriano<sup>a</sup>, J. A. Vidal-Moya<sup>a</sup>, T. Blasco<sup>a</sup>, R. Issaadi<sup>b</sup>, J. M. Lopez Nieto<sup>a,\*</sup>

<sup>a</sup>) Instituto de Tecnología Química, Universitat Politècnica de València-Consejo Superior de Investigaciones Científicas, Avenida de los Naranjos s/n, 46022 Valencia, España

<sup>b</sup>) Hydrogen Energy Applications Laboratory, Faculty of Technology, University of Blida 1, Algeria.

<sup>c</sup>) Current address: Total Research Center-Qatar (TRCQ), Qatar Science & Technology Park, Al Gharrafa, Doha, P.O. Box 9803, Qatar.

\*Corresponding author: [jmlopez@itq.upv.es](mailto:jmlopez@itq.upv.es)

## **CONTENTS:**

### **Catalyst Preparation**

**Table S1.** Characteristics of catalysts used as references.

**Fig. S1.** XRD pattern of  $\text{VO}_2 + \text{APT}$ , heat-treated under nitrogen at 600 °C, using different heating rates and hold times.

**Fig. S2.** XRD pattern of  $\text{Al}_2\text{O}_3$ -supported W-V-O oxide bronzes.

**Fig. S3.** XRD patterns of reference samples.

**Fig. S4.** Raman spectra of reference samples.

**Fig. S5.** Diffuse reflectance UV-vis spectra of reference samples.

**Fig. S6.** EPR spectra of reference samples.

**Fig. S7.** Simulation of EPR spectrum of a W-V-O oxide bronze sample prepared hydrothermally.

**Fig. S8.** W 4f core-level XPS spectra of W,V-containing catalysts.

**Fig. S9.** XRD (A) and Raman (B) spectra of fresh (a) and used (b) **S-I-2** catalyst. Used catalysts catalyst after 70 h time on stream (see Fig. 9).

**Table S2.** Catalytic performance of catalysts during the oxidative dehydrogenation of ethane at 500°C.

### **References**

## Catalyst Preparation

Reference materials were synthesized and used for characterization purposes and catalytic tests:

a) V-containing *h*-WO<sub>3</sub> bronze with HTB structure were prepared by hydrothermal synthesis according to the preparation procedure described previously [ref. 1]. Finally, the sample was heat-treated at 600°C/2h in N<sub>2</sub> atmosphere. This sample was named as **WV-HT**.

b) Vanadium oxide supported on alumina. This is a benchmark catalyst used for the oxidative dehydrogenation of alkanes [ref. 2]. This material was prepared by the wet-impregnation method of  $\gamma$ -Al<sub>2</sub>O<sub>3</sub> using an aqueous solution of ammonium metavanadate. The mixture was rotaevaporated until complete dryness and the material was dried at 110°C overnight. Finally, the sample was calcined at 600°C for 6 h. The sample is named as **VO<sub>x</sub>/AL**.

c) Vanadium oxide supported on tungsten hexagonal bronze supported on alumina. It was prepared by the same method than (VO<sub>x</sub>/AL), i.e. impregnation with an aqueous ammonium metavanadate solution, but using an alumina supported tungsten hexagonal bronze (which was previously prepared by using reflux) rather than pure alumina. This sample was finally heat-treated as 600°C in N<sub>2</sub>. This sample was named as **V/W/AL**.

d) Al<sub>2</sub>O<sub>3</sub>-supported V-W-O oxide catalysts was prepared by impregnation of alumina with an aqueous solution of ammonium metavanadate and ammonium tungstate. The catalysts was finally heat-treated as 600°C in N<sub>2</sub>. This sample is named as **VW/AL**.

In all cases, the V/W atomic ratio was ca. 0.2.

**Table S1.** Characteristics of catalysts used as references

| <b>Catalyst</b>          | <b>Synthesis Procedure</b>                                                                                                               | <b>S<sub>BET</sub></b><br><b>(m<sup>2</sup> g<sup>-1</sup>)</b> | <b>V/W</b><br><b>(XPS)</b> | <b>V/Al</b><br><b>(XPS)</b> |
|--------------------------|------------------------------------------------------------------------------------------------------------------------------------------|-----------------------------------------------------------------|----------------------------|-----------------------------|
| <b>WV-HT</b>             | Hydrothermal synthesis                                                                                                                   | 19                                                              | 0.090                      | 0                           |
| <b>VO<sub>x</sub>/AL</b> | Impregnation of $\gamma$ -Al <sub>2</sub> O <sub>3</sub> with aqueous solution of ammonium metavanadate                                  | 186                                                             | 0                          | 0.015                       |
| <b>V/W/AL</b>            | Impregnation of WO <sub>x</sub> / $\gamma$ -Al <sub>2</sub> O <sub>3</sub> <sup>(a)</sup> with aqueous solution of ammonium metavanadate | 130                                                             | 0.23                       | 0.023                       |
| <b>VW/AL</b>             | Impregnation of $\gamma$ -Al <sub>2</sub> O <sub>3</sub> with aqueous solution of ammonium metavanadate and ammonium tungstate           | 132                                                             | 0.20                       | 0.015                       |

a) The sample WO<sub>x</sub>/ $\gamma$ -Al<sub>2</sub>O<sub>3</sub> was prepared by impregnation of  $\gamma$ -Al<sub>2</sub>O<sub>3</sub> with an aqueous solution of ammonium tungstate and ammonium oxalate and heat-treated at 450°C for 2h in N<sub>2</sub>.

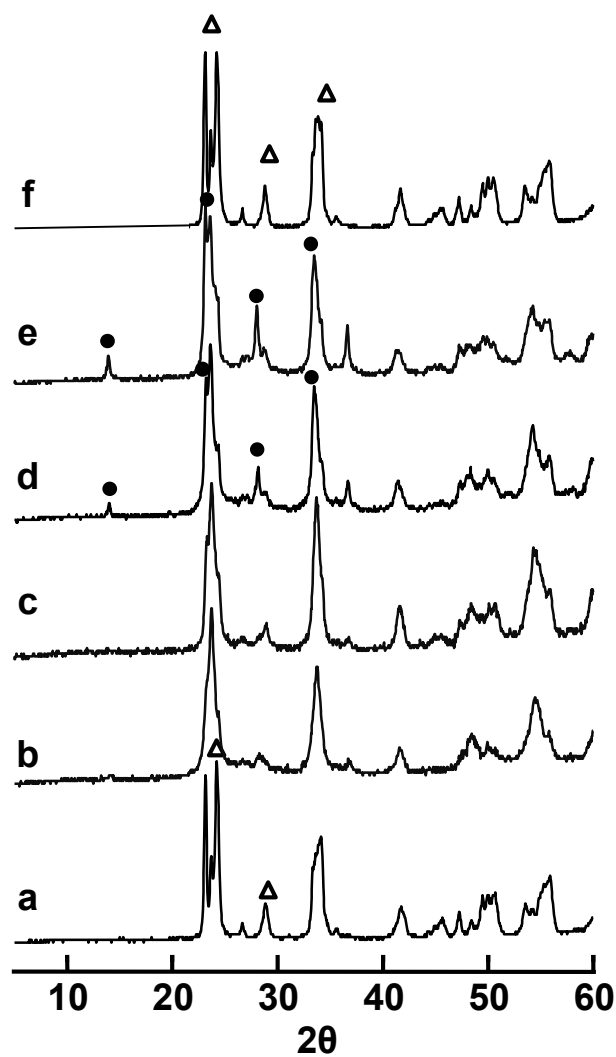

**Fig. S1.** XRD pattern of  $\text{VOSO}_4 + \text{APT}$ , heat-treated under nitrogen at  $600\text{ }^\circ\text{C}$ , using different heating rates and hold times: a)  $3^\circ\text{C min}^{-1}$ , hold for 3 h; b)  $10^\circ\text{C min}^{-1}$ , hold for 3 hours; c)  $100^\circ\text{C min}^{-1}$ , hold for 1 hours; d)  $100^\circ\text{C min}^{-1}$ , hold for 2 hours; e)  $100^\circ\text{C min}^{-1}$ , hold for 3 hours; f)  $100^\circ\text{C min}^{-1}$ , hold for 5 hours. Symbols: HTB structure ( $\bullet$ ); monoclinic  $\text{WO}_3$  ( $\Delta$ ).

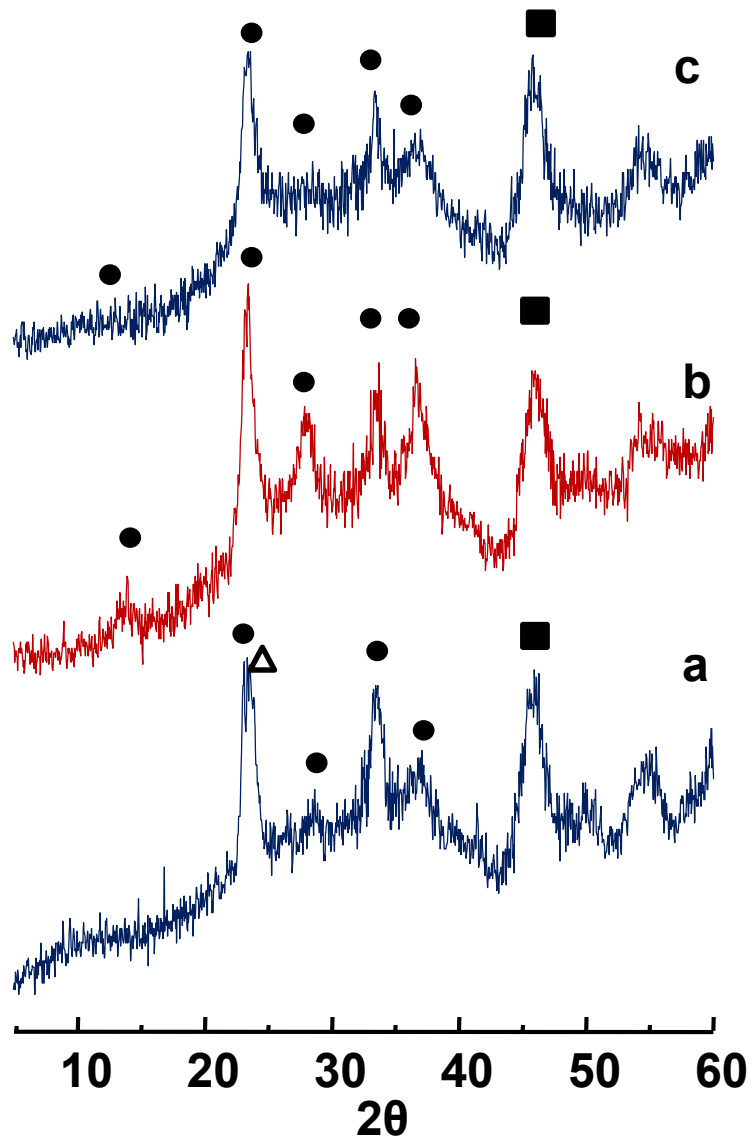

**Fig. S2.** XRD pattern of  $\text{Al}_2\text{O}_3$ -supported W-V-O oxide bronzes. Catalysts: a) S-I-1; b) S-I-2; c) S-I-3. Details reported in Table 1. Symbols: HTB structure ( $\bullet$ ); monoclinic  $\text{WO}_3$  ( $\Delta$ );  $\gamma$ - $\text{Al}_2\text{O}_3$  ( $\blacksquare$ ).

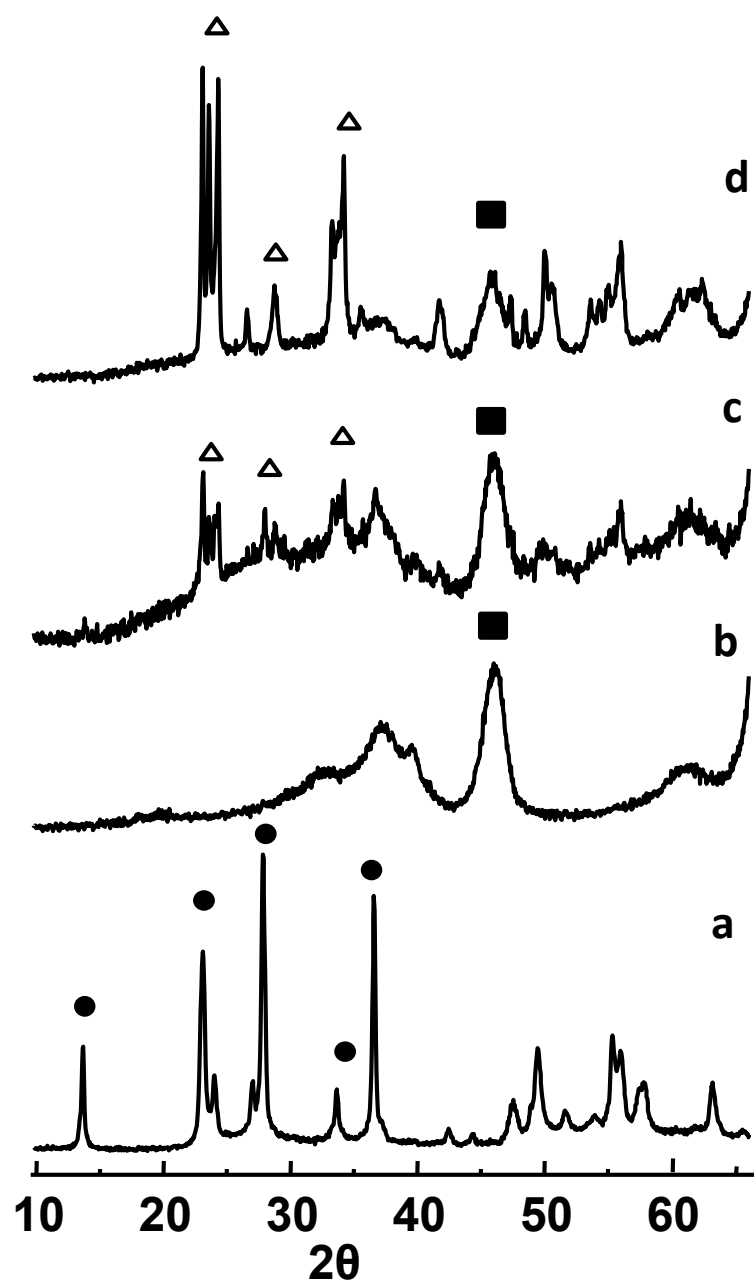

**Fig. S3.** XRD patterns of reference samples: a) unsupported W-V-O bronze prepared hydrothermally (sample **WV-HT**); b)  $\gamma$ -Al<sub>2</sub>O<sub>3</sub>-supported vanadium oxide (sample **VO<sub>x</sub>/AL**); c) vanadium oxide supported on WO<sub>3</sub>/Al<sub>2</sub>O<sub>3</sub> (sample **V/W/AL**); d) Al<sub>2</sub>O<sub>3</sub>-supported W-V-O (sample **VW/AL**). Symbols: HTB structure (●); monoclinic WO<sub>3</sub> (Δ);  $\gamma$ -Al<sub>2</sub>O<sub>3</sub> (■).

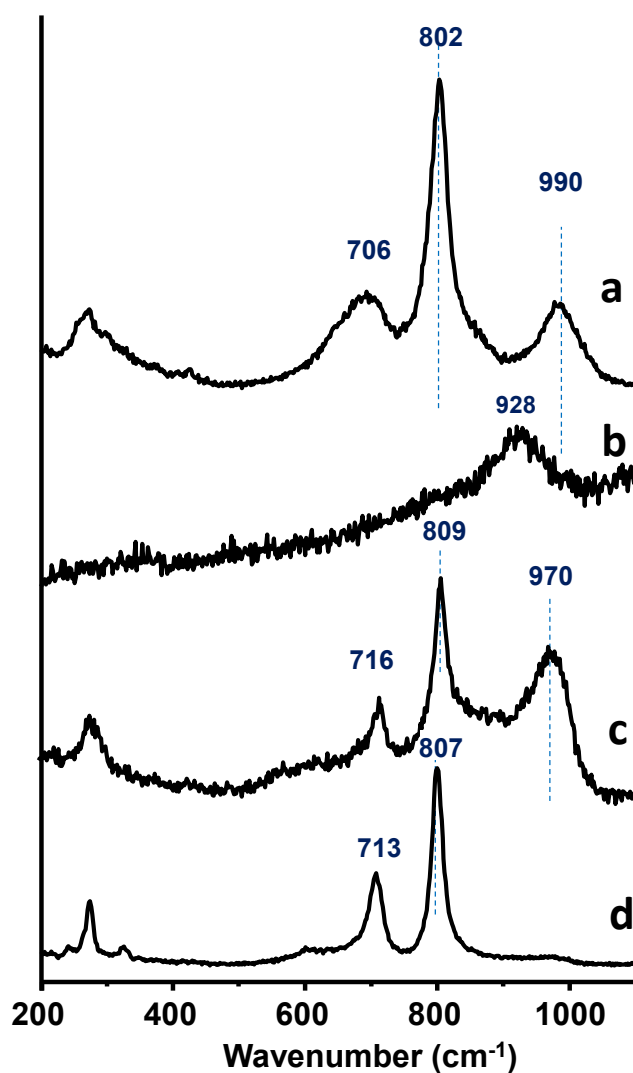

**Fig. S4.** Raman spectra of reference samples: a) unsupported W-V-O bronze prepared hydrothermally (sample **WV-HT**); b)  $\gamma$ -Al<sub>2</sub>O<sub>3</sub>-supported vanadium oxide (sample **VO<sub>x</sub>/AL**); c) vanadium oxide supported on WO<sub>3</sub>/Al<sub>2</sub>O<sub>3</sub> (sample **V/W/AL**); d) Al<sub>2</sub>O<sub>3</sub>-supported W-V-O (sample **VW/AL**).



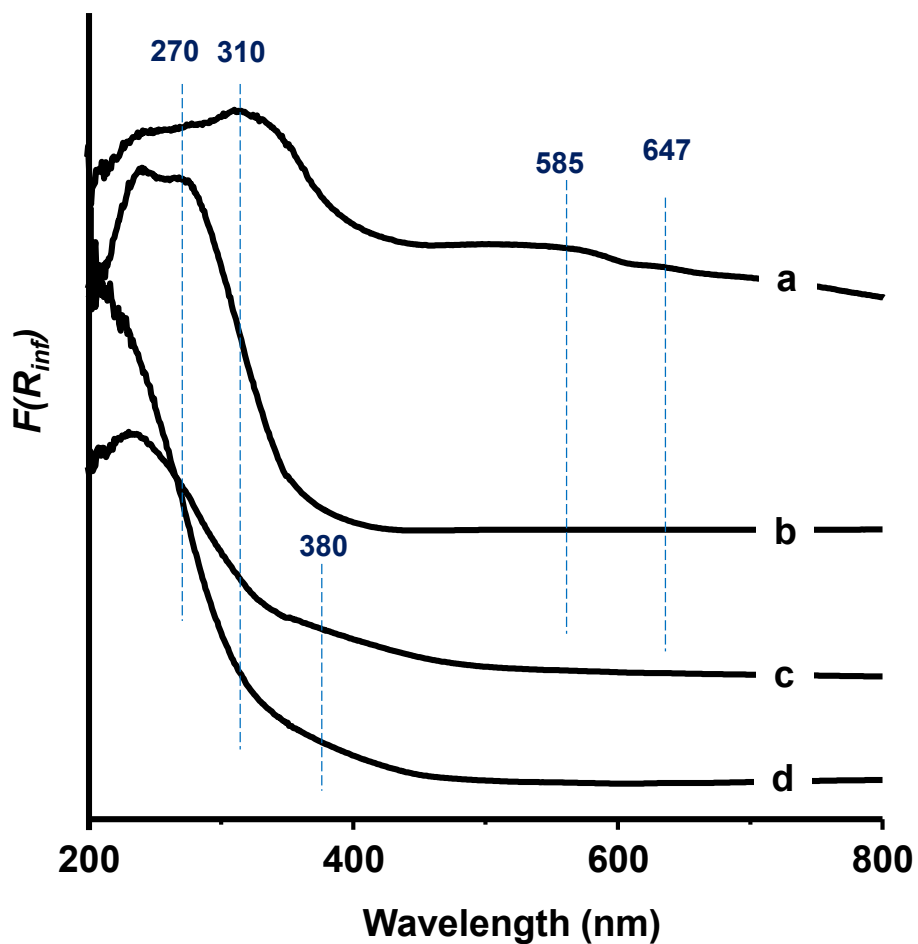

**Fig. S5.** Diffuse reflectance UV-vis spectra of reference samples: a) unsupported W-V-O bronze prepared hydrothermally (sample **WV-HT**); b)  $\gamma$ - $\text{Al}_2\text{O}_3$ -supported vanadium oxide (sample **VO<sub>x</sub>/AL**); c) vanadium oxide supported on  $\text{WO}_3/\text{Al}_2\text{O}_3$  (sample **V/W/AL**); d)  $\text{Al}_2\text{O}_3$ -supported W-V-O (sample **VW/AL**).

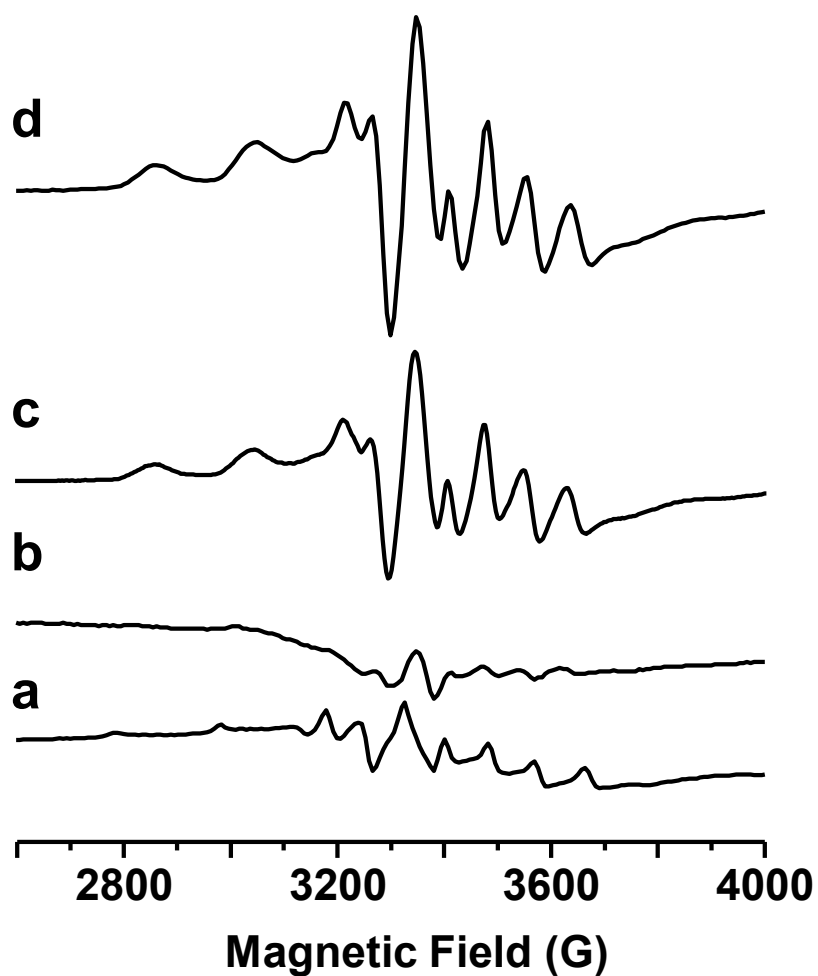

**Fig. S6.** EPR spectra of references samples: a) unsupported W-V-O bronze prepared hydrothermally (sample **WV-HT**); b)  $\gamma$ -Al<sub>2</sub>O<sub>3</sub>-supported vanadium oxide (sample **VO<sub>x</sub>/AL**); c) vanadium oxide supported on **WO<sub>x</sub>/Al<sub>2</sub>O<sub>3</sub>** (sample **V/W/AL**); d) Al<sub>2</sub>O<sub>3</sub>-supported W-V-O (sample **V-W/AL**).

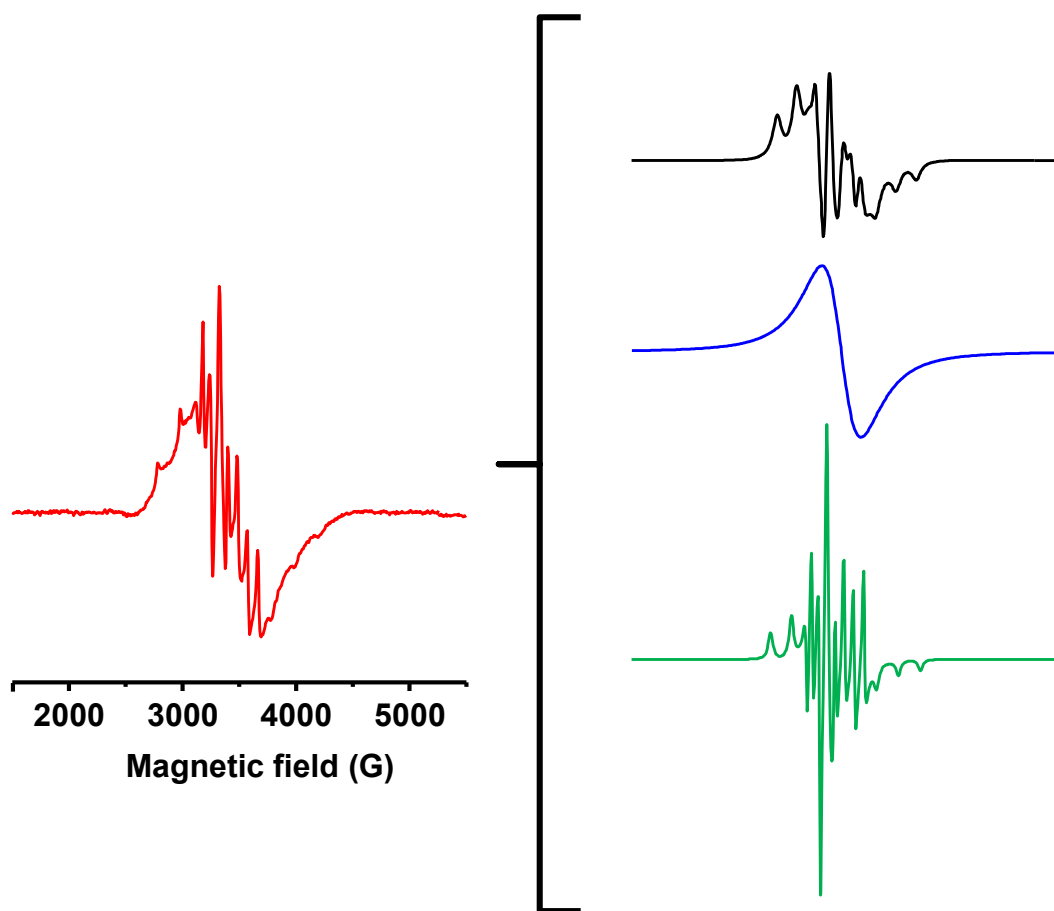

**Fig. S7.** Simulation of EPR spectrum of a W-V-O oxide bronze sample prepared hydrothermally: **WV-HT**. Original (left) and deconvoluted (right) spectra. The characteristics of each deconvoluted spectrum is also included (right).

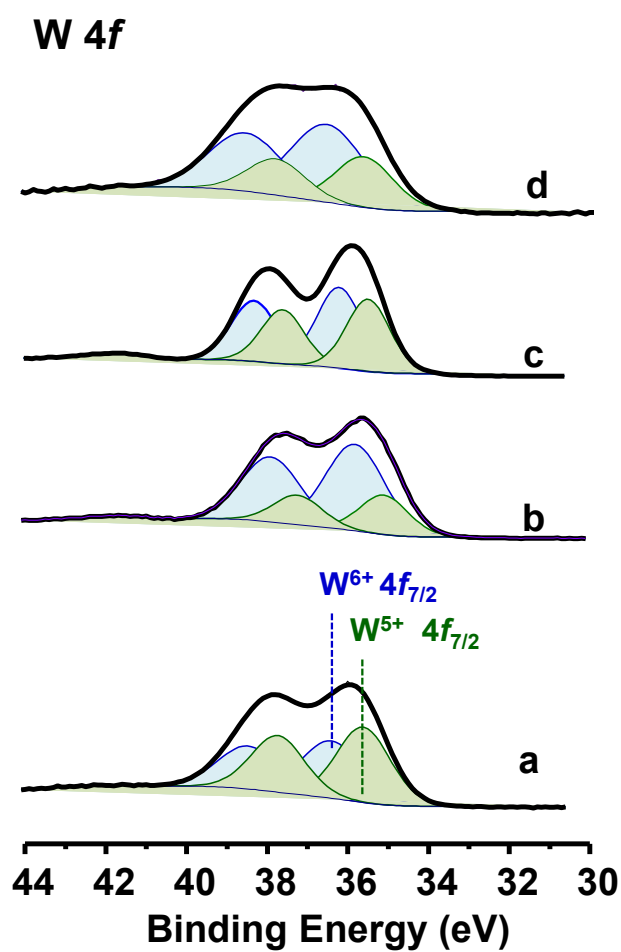

**Fig. S8.** W 4f core-level XPS spectra of W,V-containing catalysts: a) S-I-2; b) U-I-2; c) WV-HT; d) V/W/AL.

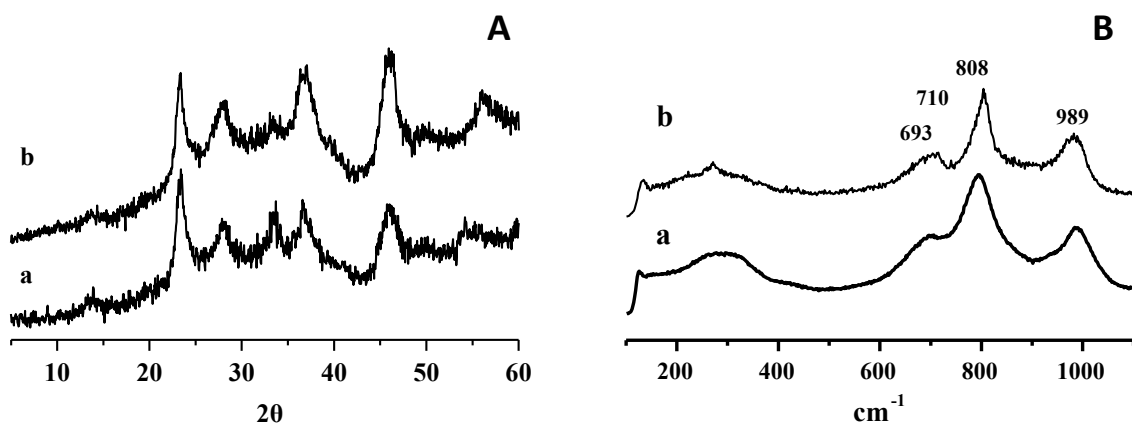

**Fig. S9.** XRD (A) and Raman (B) spectra of fresh (a) and used (b) S-I-2 catalyst. Used catalysts catalyst after 70 h time on stream (see Fig. 9).

**Table S2.** Catalytic performance of catalysts during the oxidative dehydrogenation at 500°C.<sup>(1)</sup>

| Sample              | V-content<br>(wt%) | Temp.<br>(°C) | Conv.<br>(%)<br>(3) | Selectivity<br>C <sub>2</sub> H <sub>4</sub> (%) | Yield<br>C <sub>2</sub> H <sub>4</sub> (%) | Reaction rate of<br>C <sub>2</sub> H <sub>6</sub> conversion <sup>(4)</sup> | STY-<br>C <sub>2</sub> H <sub>4</sub><br><sup>(5)</sup> | C <sub>2</sub> H <sub>4</sub> formation per<br>weight of vanadium<br><sup>(6)</sup> |
|---------------------|--------------------|---------------|---------------------|--------------------------------------------------|--------------------------------------------|-----------------------------------------------------------------------------|---------------------------------------------------------|-------------------------------------------------------------------------------------|
| S-I-1               | 0.67               | 502           | 13.5                | 79.6                                             | 10.7                                       | 13.4                                                                        | 37.5                                                    | 5.60                                                                                |
| S-I-2               | 2.5                | 509           | 24.1                | 71.4                                             | 17.2                                       | 21.5                                                                        | 60.2                                                    | 2.41                                                                                |
| S-I-3               | 4.9                | 517           | 45.4                | 44.9                                             | 20.4                                       | 25.5                                                                        | 71.4                                                    | 1.45                                                                                |
| U-I-2               | 9.0                | 502           | 1.3                 | 65.9                                             | 0.9                                        | 1.1                                                                         | 3.1                                                     | 0.03                                                                                |
| S-III-2             | 2.5                | 502           | 15.5                | 68.0                                             | 10.5                                       | 13.1                                                                        | 36.7                                                    | 1.47                                                                                |
| WV-HT               | 9.0                | 500           | 7.4                 | 49.8                                             | 3.7                                        | 4.6                                                                         | 12.9                                                    | 0.14                                                                                |
| VW/AL               | 3.1                | 500           | 22.3                | 61.8                                             | 13.8                                       | 17.2                                                                        | 48.2                                                    | 1.61                                                                                |
| V/W/AL              | 3.1                | 500           | 38.0                | 42.0                                             | 15.9                                       | 20.0                                                                        | 56.0                                                    | 1.80                                                                                |
| VO <sub>x</sub> /AL | 3.1                | 506           | 25.3 <sup>(2)</sup> | 49.6                                             | 12.5                                       | 7.8                                                                         | 21.8                                                    | 0.70                                                                                |

1) Ethane/oxygen/nitrogen molar ratio of 4/8/88 and a contact time, W/F, of 80 g<sub>cat</sub> h (mol<sub>C<sub>2</sub>H<sub>6</sub></sub>)<sup>-1</sup>; Temperature= 500°C; 2) At a contact time, W/F, of 160 g<sub>cat</sub> h (mol<sub>C<sub>2</sub>H<sub>6</sub></sub>)<sup>-1</sup>; 3) Conversion of ethane (%); 4) Reaction rate of C<sub>2</sub>H<sub>6</sub> conversion in 10<sup>4</sup> mol<sub>C<sub>2</sub>H<sub>6</sub></sub> g<sub>cat</sub><sup>-1</sup> h<sup>-1</sup>; 5) Space-time yield, STY<sub>C<sub>2</sub>H<sub>4</sub></sub>, in g<sub>C<sub>2</sub>H<sub>4</sub></sub> kg<sub>cat</sub><sup>-1</sup> h<sup>-1</sup>; 6) C<sub>2</sub>H<sub>4</sub> formation per amount of vanadium, in g<sub>C<sub>2</sub>H<sub>4</sub></sub> g<sub>v</sub><sup>-1</sup> h<sup>-1</sup>.

;

## References

1. a) M. D. Soriano, P. Concepción, J. M. López Nieto, F. Cavani, S. Guidetti, and C. Trevisanut, *Green Chem.* 2011, **13**, 2954–2962; b) D. Delgado, A. Chierigato, M. D. Soriano, E. Rodriguez-Aguado, L. Ruiz-Rodriguez, E. Rodriguez-Castellon, and J. M. Lopez Nieto, *Eur. J. Inorg. Chem.* **2018**, 1204–1211
1. T. Blasco, A. Galli, J.M. López Nieto, and F. Trifiró, *J. Catal.* 1997, 169, 203–211.
2. B. Solsona, A. Dejoz, T. Garcia, P. Concepcion, J.M. Lopez Nieto, M.I. Vazquez, and M.T. Navarro, *Catal. Today* 2006, **117**, 228-233.
